1  
2  
3  
4  
5  
6  
7  
8  
9  
10  
11  
12  
13  
14  
15  
16  
17  
18  
19  
20  
21  
22  
23  
24  
25  
26  
27  
28  
29  
30  
31  
32  
33  
34  
35  
36  
37  
38

# Activation of innate immune signalling during development predisposes to inflammatory intestine and shortened lifespan

## Authors

Kyoko Yamashita<sup>1†</sup>, Ayano Oi<sup>1†</sup>, Hina Kosakamoto<sup>1</sup>, Toshitaka Yamauchi<sup>1</sup>,  
Hibiki Kadoguchi<sup>2</sup>, Takayuki Kuraishi<sup>2</sup>, Masayuki Miura<sup>1</sup>, Fumiaki Obata<sup>1\*</sup>

## Affiliations

1, Department of Genetics, Graduate School of Pharmaceutical Sciences, The University of Tokyo, 7-3-1 Hongo, Bunkyo-ku, Tokyo 113-0033, Japan

2, Faculty of Pharmacy, Institute of Medical, Pharmaceutical and Health Sciences, Kanazawa University, Shizenken, Kakuma-machi, Kanazawa, Ishikawa 920-1192, Japan

†, These authors contributed equally to this work.

\*, Corresponding author, [fumiaki.obata@g.ecc.u-tokyo.ac.jp](mailto:fumiaki.obata@g.ecc.u-tokyo.ac.jp) (F.O.)

## Abstract

Early-life inflammatory response is associated with risks of age-related pathologies. How transient immune signalling activity during animal development influences life-long fitness is not well understood. Using *Drosophila* as a model, we find that activation of innate immune pathway IMD signalling in the developing larvae increases adult starvation resistance, decreases food intake, and shortens organismal lifespan. Interestingly, lifespan is shortened by the IMD activation in the larval gut and fat body, while starvation resistance and food intake are altered by that in neurons. The adult flies developed with IMD activation show sustained IMD activity in the gut, despite complete tissue renewal during metamorphosis. The inflammatory adult gut is associated with a greater amount of *Gluconobacter* sp., characteristic gut microbiota increased in response to immune activation. Removing gut microbiota by antibiotics attenuates the increase of IMD activity and rescues the shortened lifespan. This study demonstrates a tissue-specific programming effect of early-life immune activation on the adult physiology and organismal lifespan.

## 39 Introduction

40

41 Immunity needs to be tightly controlled as both shortages and excesses of immune  
42 activation are detrimental to organisms. Chronic, and often systemic, inflammatory  
43 response occurs during ageing, which can increase the risk of various age-related  
44 diseases [1]. *Drosophila melanogaster* is a genetically tractable model for studying  
45 how immune pathways are involved in the ageing process. The immune deficiency  
46 (IMD) pathway is an evolutionally conserved immune regulator in *Drosophila*, which  
47 is a counterpart of the tumour necrosis factor receptor (TNFR) pathway in mammals  
48 [2]. The IMD pathway is activated upon infection with bacteria possessing DAP-type  
49 peptidoglycan, and is known to be spontaneously activated in aged animals, at least  
50 partly in a gut microbiota-dependent manner. Removing microbiota or overexpressing  
51 negative regulators for the IMD pathway in the adult gut attenuates age-related IMD  
52 activation and concomitantly extends lifespan [3–5]. Activation of the IMD pathway in  
53 gut progenitor cells induces hyperproliferation of intestinal stem cells [6]. A chronic  
54 inflammatory condition in aged flies triggers neurodegeneration and shortens lifespan,  
55 which can be rescued by inhibiting IMD signalling in glia cells [7]. Age-related  
56 activation of the IMD pathway in the renal (Malpighian) tubules induced by a  
57 commensal *Acetobacter persici* triggers age-dependent metabolic shifts, including  
58 purine metabolism [8]. These studies have revealed that age-related immune activation  
59 in various tissues leads to organismal ageing.

50

51 Early-life environmental stressors have prolonged effects on adult health, as often  
52 described as the "Developmental Origins of Health and Diseases (DOHaD)  
53 hypothesis" [9–11]. In *Drosophila*, dietary protein restriction only in the larval stage  
54 extends lifespan via altered lipid metabolism [12]. Developmental exposure to low-  
55 dose oxidant remodels the gut microbiome and extends lifespan [5]. Hypoxic  
56 conditions during development decrease starvation resistance and lifespan [13]. These  
57 studies illustrate how environmental factors during development can program adult  
58 physiology and lifespan.

59 Various stressors regarded as risk factors for age-related diseases, such as  
60 malnutrition, irradiation, chemical exposures, smoke, alcohol, or even mental stress,  
61 commonly lead to inflammatory response. A longitudinal cohort study suggested that  
62 childhood infection is correlated with the incidence of cardiovascular diseases in 40-  
63 year old humans [14]. This and many other epidemiological studies have implied that

74 early-life inflammation is associated with inflammatory diseases and mortality in  
75 adulthood [15,16], however few studies directly test the causal relationship. Irradiation  
76 during development increases cell death in the adult brain and decreases locomotive  
77 ability and organismal lifespan in *Drosophila* [17]. In this condition, persistent  
78 immune activation is observed in adult flies [18]. On the other hand, oral infection of  
79 *Erwinia carotovora* (Ecc15) in larvae does not affect the lifespan of adult flies [19].  
80 Genetic manipulation is also useful to test how early-life signalling activity impacts  
81 adult lifespan. For example, loss of function of *PGAM5* triggers immune-related genes  
82 in larvae, which is associated with increased lifespan through a prolonged FoxO  
83 activation [20]. Decreasing mitochondrial electron transport by knocking down *ND75*  
84 specifically in muscles on the first day of the larval stage can extend lifespan [21]. It is  
85 likely that infection as well as other stressors trigger not only immune activation but  
86 also complex reactions such as tissue injury/recovery response or metabolic  
87 remodelling. Thus, despite the implication that early-life immune response affects  
88 organismal lifespan, whether an immune signalling activity *per se* during development  
89 influences the lifespan and adult physiology has not been directly assessed.

90  
91 In this study, we attempted to test whether immune activation in a larval stage-  
92 restricted manner can alter adult fitness and lifespan. We found, in adult flies with  
93 larval IMD activation, that immune and metabolic alteration occurs and shortens  
94 organismal lifespan.

95

96

## 97 Results

### 99 Establishment of mild immune activation during development

100 We used the Gene Switch (GS) system to achieve precise control of gene manipulation  
101 [22]. GS is useful to induce any gene of interest by an inducer RU486 in a dose-  
102 dependent manner. For activation of the innate immune IMD pathway in larvae, we  
103 overexpressed constitutive active form of IMD ( $IMD^{CA}$ ) using a ubiquitous driver  
104 *Daughterless GS* ( $Da^{GS}$ ).  $IMD^{CA}$  lacks the N-terminal inhibitory domain and therefore  
105 is active in the absence of bacterial stimulation [6]. We put embryos of  $Da^{GS}>IMD^{CA}$   
106 and its negative control  $Da^{GS}>LacZ$  on top of the standard *Drosophila* diets containing  
107 various doses of RU486, and allowed them to develop into adult flies (Fig. 1A).  
108 Feeding 200  $\mu$ M of RU486, the concentration frequently used for adult flies, caused  
109 higher developmental lethality even for the control flies in our laboratory condition.  
110 Decreasing the RU486 concentration to 5  $\mu$ M resulted in little effect on viability and  
111 adult body weight for the control ( $Da^{GS}>LacZ$ ) animals, but strong lethality and  
112 decreased body weight for  $Da^{GS}>IMD^{CA}$ , suggesting that IMD activation impairs  
113 larval growth (Fig. 1B, C). When the concentration of RU486 was decreased to 1  $\mu$ M,  
114 adult  $Da^{GS}>IMD^{CA}$  flies showed normal body weight (Fig. 1C). At this concentration,  
115 we observed mild developmental delay compared with the control (no RU486  
116 treatment), but this was rather due to a side effect of RU486, as the phenotype was also  
117 obvious for  $Da^{GS}>LacZ$  flies (Fig. S1A).

118 We first confirmed that gene expression was indeed induced with as low as 1  
119  $\mu$ M of RU486, as visualised by GFP expression (Fig. S1B). The driver activity is  
120 detected in the larval brain, the fat body, the gut and the Malpighian tubules (Fig.  
121 S1C). To quantify the level of IMD activation, we performed quantitative RT-PCR  
122 analysis for antimicrobial peptide (AMP) genes regulated by the IMD signalling  
123 pathway. IMD target genes *Diptericin A* (*DptA*) and *Drosocin* (*Dro*) were upregulated  
124 in the whole body of  $Da^{GS}>IMD^{CA}$  third instar larvae (Fig. 1D). These genes were  
125 upregulated mildly in various tissues such as the brain, the gut, and the fat body (Fig.  
126 S2A). We further performed a transcriptomic profiling by 3'mRNA-sequencing  
127 analysis using the gut tissue. AMPs predominantly regulated by the IMD pathway  
128 were all upregulated, while those regulated by other immune pathways were not,  
129 suggesting that IMD signalling was specifically activated in this experimental setting  
130 (Fig. 1E, Table S1). The list of differentially-expressed genes did not contain typical  
131 damage-responsive genes such as *upd3*, which is known to be massively increased in

32 the larval gut upon oral infection of Ecc15 [19]. The AMP induction was already  
33 suppressed in the whole body of young adult male flies (Fig. S2B). Therefore, in this  
34 experimental setting, we can increase the IMD signalling pathway mildly in a juvenile-  
35 restricted manner.

### 37 Larval immune activation influences adult fitness

38 The magnitude of IMD activation in the larvae of *Da<sup>GS</sup>>IMD<sup>CA</sup>* with 1  $\mu$ M  
39 RU486 was weak enough to avert disturbance of developmental growth. We  
40 questioned whether this sublethal, transient immune activation in developing animals  
41 has a prolonged effect on adult physiology and ultimately alters lifespan (Fig. 2A). The  
42 lifespan of adult flies of *Da<sup>GS</sup>>IMD<sup>CA</sup>* fed with 1  $\mu$ M of RU486 during the larval stage  
43 was significantly shortened in both male and female flies (Fig. 2B, C). In the control  
44 (*Da<sup>GS</sup>>LacZ*), RU486 did not affect the male lifespan at all, whereas it slightly  
45 decreased female lifespan. This side effect of RU486 on female flies would explain the  
46 greater extent in shortening female lifespan of *Da<sup>GS</sup>>IMD<sup>CA</sup>* with 1  $\mu$ M of RU486  
47 (Fig. 2C). We therefore decided to use male flies mainly for the rest of the study. The  
48 lifespan shortening by larval IMD activation was dose-dependent, as 2  $\mu$ M RU486  
49 further decreased the lifespan (Fig. 2B, C).

50 To understand how adult fitness is altered by larval IMD activation, we further  
51 assessed the physiological conditions of the adult flies. Dietary protein amount is  
52 negatively correlated with lifespan. It was possible that the decrease of lifespan was  
53 owing to the increased food intake. Unexpectedly, young male flies that had  
54 experienced larval IMD activation took less food compared with the negative control  
55 (Fig. 2D). These data at least suggested that the lifespan shortening by larval IMD  
56 activation may not have been attributed to the dietary protein intake. Surprisingly,  
57 despite the decrease in food intake, they had increased starvation resistance (Fig. 2E).  
58 Larval IMD activation did not alter paraquat (oxidant) resistance, and it did induce  
59 hyper susceptibility to high salt stress (Fig. S3). These phenotypes invalidated the  
60 possibility that the shortened lifespan by larval IMD activation was simply due to the  
61 increased susceptibility to stresses (general sickness of the flies). Taken together, we  
62 concluded that IMD activation during development induces prolonged physiological  
63 changes in adult flies and decreases lifespan.

## 55 **Starvation resistance and lifespan are distinctively regulated by larval IMD** 56 **activation**

57 To identify which tissue(s) shortens lifespan upon IMD activation, we overexpressed  
58 *IMD<sup>CA</sup>* in a tissue-specific manner. We used Gene Switch drivers for neurons (*Elav<sup>GS</sup>*),  
59 the gut and the fat body (*TI<sup>GS</sup>*), and the Malpighian tubules (*Uro<sup>GS</sup>*) (Fig. 3A, Fig. S4).  
60 We observed that overexpression of *IMD<sup>CA</sup>* only by *TI<sup>GS</sup>* decreased lifespan,  
61 suggesting that IMD activation in the larval gut and/or fat body induces shortened  
62 lifespan (Fig. 3B). Interestingly, however, starvation resistance was not elevated in  
63 *TI<sup>GS</sup>>IMD<sup>CA</sup>* flies, but this phenotype was rather observed in *Elav<sup>GS</sup>>IMD<sup>CA</sup>* flies (Fig.  
64 3C). Therefore, shortened lifespan and starvation resistance are distinctive phenotypes  
65 triggered by the IMD activity from the different tissues. Similarly, the decreased food  
66 intake was induced only when *Elav<sup>GS</sup>* was used to drive IMD activation (Fig. 3D). The  
67 data indicate that food intake and starvation resistance have a correlation, while the  
68 lifespan shortening occurred in parallel. In this study, we focused on the lifespan  
69 phenotype. As the phenotype of lifespan shortening by *TI<sup>GS</sup>>IMD<sup>CA</sup>* is often weaker  
70 than *Da<sup>GS</sup>>IMD<sup>CA</sup>*, we used the *Da<sup>GS</sup>>IMD<sup>CA</sup>* for the rest of the study.

## 81 82 **Larval IMD activation causes spontaneous immune activation in the adult gut**

83 IMD activity is known to increase during ageing and negatively impacts organismal  
84 lifespan. To discover whether the shortened lifespan is due to the accelerated  
85 inflammatory response, we quantified the expression of *DptA* in the aged flies. We  
86 found that adult male flies with larval IMD activation showed an elevation of whole  
87 body IMD activity at five weeks of age (Fig. 4A). This IMD activity was likely  
88 derived from the gut as we detected a sharp increase of *DptA* expression in the gut  
89 (Fig. 4B).

90 The fact that developmental IMD activation increased *DptA* expression in the  
91 adult gut suggested that an irreversible change occurred in this tissue. To describe the  
92 tissue condition, we performed a transcriptomic analysis of the young adult gut from  
93 *Da<sup>GS</sup>>IMD<sup>CA</sup>* fed with RU486 during the larval stage. Unexpectedly, on day 10 in  
94 adult male flies, many antimicrobial peptides were already upregulated (Fig. 4C, Table  
95 S2). Unlike the larval gut, where IMD target genes were specifically upregulated, the  
96 adult gut showed increased antimicrobial peptides regulated by Toll- or JAK/STAT as  
97 well (Fig. 4C). This observation suggested that increased antimicrobial peptides were

98 not due to the sustained RU486 in their gut, but rather to the general inflammatory  
99 response of the tissue. Although we could not deny the possibility that overexpressed  
100 IMD<sup>CA</sup> protein in the larval gut remained in the adult gut, it was less likely considering  
101 that the larval gut is completely degenerated and replaced by the newly-generated adult  
102 gut [23–25].

103 We assumed that an experience of larval immune activation augments  
104 immunity as an adaptive response to prepare for future infection in the adult flies. As  
105 the increased *DptA* expression is restricted in the gut, we asked whether the flies were  
106 resistant to oral infection that could be influenced by AMPs [26]. Unexpectedly, the  
107 larval IMD induction was not beneficial for adult flies against *Pseudomonas*  
108 *entomophila* infection, but rather it increased susceptibility (Fig. S5). Therefore, higher  
109 IMD activity in the gut is thought to be pathological and implies accelerated tissue  
110 ageing.

111 We also noticed that intestinal alkaline phosphatase (IAP) *Alp9* and *Alp10* were  
112 decreased in the adult gut (Fig. 4C, Table S2). Among 18 downregulated genes (Fold  
113 change < 0.5,  $p < 0.05$ ), two IAPs were listed in the third and fourth place, the expression  
114 of which decreased by one third of the control. IAP is an evolutionally-conserved  
115 regulator of gut homeostasis, the expression of which is known to be downregulated  
116 during ageing [27]. Decreased IAP expression is also reported in rodents and in human  
117 patients of inflammatory bowel disease [28]. Increased IAP expression is beneficial to  
118 suppress DSS-induced colitis in mice [29]. Exogenous Alp supplementation can  
119 augment the tissue homeostasis and extend mouse and fly lifespans [27]. In our model,  
120 feeding adult flies that experienced larval IMD activation with a high dose of Alp (100  
121 units/vial) suppressed *DptA* upregulation (Fig. 4D). Sustained Alp (5 units/vial)  
122 supplementation increased the lifespan (Fig. 4E). These data suggest that decreased  
123 IAP expression, at least partially, contributes to the inflammatory response in the gut  
124 and the concomitant shortened lifespan. Decreased IAP expression did not occur in the  
125 larval gut (Table S1). *Alp10* was intriguingly listed in the upregulated genes in the  
126 larval gut. Genetic IMD activation in the adult gut decreased IAP expression,  
127 suggesting that decreased IAP is likely due to the upregulated IMD signalling (and/or  
128 concomitant tissue senescence) (Fig. S6). Considering that IAP suppresses IMD  
129 activity, developmental IMD activation could trigger the inflammatory vicious cycles  
130 of IAP downregulation and IMD upregulation (Fig. 4F).

## 32 Gut microbiota exacerbate gut immune activation and shortened lifespan

33 Gut microbiome increases the innate immune activation during ageing, which shortens  
34 lifespan [4,30]. *Acetobacteraceae*, such as *Acetobacter aceti*, is known to increase  
35 IMD activity in aged flies, and removing it results in extended lifespan [5]. Another  
36 *Acetobacteraceae* *Gluconobacter* spp. are known to expand in the gut microbiota in  
37 response to the host immune activation, and induce mortality of the flies [31,32]. We  
38 assumed that altered gut microbiota might contribute to the lifespan shortening in adult  
39 flies that experienced larval IMD activation. To test this hypothesis, we performed 16S  
40 rRNA gene amplicon sequencing analysis of the gut microbiota in the young adult gut.  
41 The result did not delineate a huge difference in the microbial composition (Fig. 5A).  
42 The total number of live bacteria assessed by colony forming unit assay was also not  
43 significantly changed (Fig. 5B). However, when we quantified the number of bacteria  
44 by quantitative PCR using a set of primer detecting genera *Acetobacter* or  
45 *Gluconobacter*, we noticed that *Gluconobacter* was significantly increased (Fig. 5C).  
46 Although we cannot distinguish whether this dysbiosis would be a consequence or a  
47 cause of the immune response, the change of the gut microbiome is another evidence  
48 that the flies suffer from the inflammatory intestine.

49 To discover whether the gut microbiota are involved in the gut inflammatory  
50 response and eventually shorten lifespan, we fed adult flies that experienced larval  
51 IMD activation with antibiotics (Rifampicin, Tetracycline, and Ampicillin) to  
52 eliminate gut microbiota. We found that IMD upregulation in the adult gut was  
53 abolished by the antibiotic treatment (Fig. 5D). In this condition, larval IMD activation  
54 did not shorten lifespan (Fig. 5E). These data suggest that gut microbiota contributed  
55 to the pathological phenotypes. Together, larval IMD activation promotes the  
56 dysregulated gut homeostasis including both host immune response and the gut  
57 microbiota (Fig. 5F).

32  
33  
34  
35  
36  
37  
38  
39  
40  
41  
42  
43  
44  
45  
46  
47  
48  
  
49  
50  
51  
52  
53  
54  
55  
56  
57  
58



## 59 Discussion

50

51 In this study, we developed a model to study how developmental immune activation  
52 influences adult fitness and ultimately organismal lifespan. Strong activation of the  
53 immune signalling pathway inhibits the developmental processes and causes lethality  
54 [33,34]. By utilising the Gene Switch system, we set up juvenile-restricted low-grade  
55 IMD activation that enabled us to obtain superficially-normal, healthy adult flies.  
56 Nonetheless, this larval IMD activation led to the development of the adult gut with  
57 induced antimicrobial peptide genes, decreased *Alp* expression, and increased  
58 *Gluconobacter* sp. in the gut microbiota, all of which are hallmarks of inflammatory  
59 gut. We assume that transient IMD activation in the larval gut sensitises the adult gut  
60 to inflammatory cues. This phenomenon might be analogous to "trained immunity" or  
61 innate immune memory by which greater protection against reinfection is achieved  
62 [35,36]. We could not observe, however, any protection of adult flies that experienced  
63 larval IMD activation to oral infection despite them having increased antimicrobial  
64 peptides. This might suggest that the chronic immune activation in the adult gut is  
65 pathological and damages the gut epithelium rather than protecting it.

66 Mechanistically, it is possible that the sensitivity of IMD signalling becomes  
67 high partly due to the dampened expression of a negative regulator of IMD, such as  
68 IAPs. We previously observed that the systemic inflammatory response in necrosis-  
69 induced flies decreases S-adenosylmethionine (SAM), a methyl donor required for  
70 histone methylation [37]. In worms, SAM is decreased during infection, and this leads  
71 to decreased H3K4me3 to regulate immune response [38]. Spontaneous immune  
72 response in aged fat body in *Drosophila* is attributed to declined lamin C expression  
73 and epigenetic deregulation [39]. Therefore, the immune-epigenetic crosstalk in the  
74 adult midgut progenitors in the larval gut would consequently alter the epigenetic  
75 homeostasis of the adult intestinal stem cells and/or their progeny enterocytes. The  
76 detailed mechanism of the IMD sensitisation needs to be further investigated.

77

78 It is widely accepted that early-life exposures to microorganisms, such as healthy gut  
79 microbiota, are essential for shaping appropriate immune and metabolic homeostasis  
80 [40–43]. Inappropriate microbial exposures therefore impact various inflammation-  
81 associated diseases in later life, including inflammatory bowel disease [44,45]. Mice  
82 born of germ-free mothers become susceptible to a high-fat diet inducing obesity, due  
83 to the loss of immune, endocrinal homeostasis developed in the absence of bacterial  
84 metabolites [46]. Early-life disturbance of microbial composition by transient

94

95 antibiotic treatment can cause obesity in adults [47,48]. Antibiotic treatment during  
96 development can also induce long-term changes in cytokine production in the brain  
97 and associated behavioural alteration [49]. Whether immune signalling *per se* in the  
98 developmental stage provokes inflammatory diseases and affects organismal lifespan,  
99 as we observed in flies, needs to be tested in mammals.

01 The important question raised by the present study is how neuronal immune activation  
02 in the larval stage leads to starvation resistance and decreased food intake in adults.  
03 Infection by pathogen decreases food intake, at least in larvae [26]. Direct IMD  
04 activation by circulating peptidoglycan in octopaminergic neurons alters oviposition  
05 but does not affect food intake [50]. As far as we know, it has not been elucidated  
06 whether activation of IMD signalling in some neurons regulates food intake in adult  
07 flies. Increased starvation resistance suggests decrease in energy expenditure and/or  
08 augmented metabolic efficiency of the animals. Immune-metabolic switch is essential  
09 for the allocation of nutrients from anabolism to immune effector production [51].  
10 Persistent activation of the IMD pathway in the fat body leads to altered metabolism  
11 [52]. IMD activation by gut microbiota can also modulate metabolic homeostasis of  
12 the host [53,54]. IMD activation in enteroendocrine cells in the gut alters the  
13 metabolism and development through an endocrine peptide Tachykinin [55]. In our  
14 model, we assume that experiencing IMD activation triggers the thrifty phenotype by  
15 modulating metabolism in the animals to prepare for future infection/stress response.  
16 This long-term immuno-metabolic interaction is an interesting direction to be explored  
17 in a future mechanistic study.

18  
19

## 20 **Methods**

### 21 **Drosophila stocks and husbandry**

22 Flies were reared on a standard diet containing 4% cornmeal, 6% baker's yeast (Saf  
23 Yeast), 6% glucose (Wako, 042-31177), and 0.8% agar (Kishida Chemical, 260-  
24 01705) with 0.3% propionic acid (Tokyo Chemical Industry, P0500) and 0.05%  
25 nipagin (Wako, 132-02635). Flies were reared under 25°C, 65% humidity with 12 h/12  
26 h light/dark cycles. The fly lines were: *Da-GeneSwitch* [56], *UAS-lacZ* (Gifted from  
27 Dr. Corey S. Goodman), *UAS-IMD<sup>CA</sup>* [6], *Elav-GeneSwitch* [22], *TI-GeneSwitch*  
28 (Gifted from Dr. Scott Pletcher), *Uro-GeneSwitch* (This study), *UAS- 2×EGFP*  
29 (Bloomington 6874). *Da-GeneSwitch*, *UAS-lacZ* and *UAS-IMD<sup>CA</sup>* were backcrossed  
30 eight generations with *w<sup>iso31</sup>*. Embryos were collected using a cage containing young  
31 (roughly 1-week-old) parents of GS and UAS lines and an acetic acid agar plate (2.3%  
32 Agar (BD214010), 10% Sucrose (Wako 196-00015), 0.35% Acetic acid (Wako 017-  
33 0256)) with live yeast paste. Equal volumes of the collected embryos were put onto the  
34 top of fly food containing RU486 (Tokyo Chemical Industry, M1732, dissolved in  
35 ethanol) or its negative control ethanol, in order to control the larval density. Adult  
36 flies eclosed within two days were collected and maintained for additional two days for  
37 maturation on standard fly diet. Then, flies were sorted by sex, put 15 flies per vial,  
38 and flipped to fresh vials every three days. Antibiotics (200 µg/mL rifampicin, 50  
39 µg/mL tetracycline, 500 µg/mL ampicillin, together with 0.12% nipagin) were added to  
40 standard diet to remove all bacteria.

41

### 42 **Developmental speed, survivability, and body weight measurement**

43 After putting the equal amount of embryos, the number of pupae on each time point  
44 was counted for developmental speed. Data were normalised by the total number of  
45 pupae. For survivability, the number of adult flies for each bottle was counted, and  
46 divided by the number of the control (without RU486 treatment). The body weight of  
47 eclosed adult flies was measured individually by an ultra-microbalance (METTLER  
48 TOLEDO, XPR2).

49

### 50 **Construction of *Uro-GeneSwitch* fly**

51 To generate the *Uro-GeneSwitch* driver, the putative 881 bp promoter sequence of  
52 *Urate oxidase (Uro)* gene was amplified by PCR using *w<sup>Dah</sup>* genomic DNA. The  
53 sequence of GeneSwitch was amplified by PCR using pElav-GeneSwitch (Addgene:  
54 83957). The backbone vector pElav-GeneSwitch was digested with KpnI, and ligated  
55 with the amplicons Uro promoter and GeneSwitch using NEBuilder HiFi DNA  
56 Assembly Kit (NEW ENGLAND BioLabs, E2621X). Transgenic lines were generated  
57 using standard methods for P-element-mediated germline transformation (BestGene  
58 Inc).

59

### 50 **RNA sequencing analysis**

51 Dissected larval or adult guts were homogenised in 150 µL of QIAzol Lysis Reagent  
52 (QIAGEN, 79306), and stored at -80 °C. Triplicate was prepared for each experimental  
53 group, containing three to five male guts per sample. Then, 350 µL of QIAzol Lysis  
54 Reagent was added and left for 30 minutes at room temperature. 100 µL of chloroform  
55 was added and mixed with vortex, then left for two minutes at room temperature.  
56 Using RNeasy Plus Micro Lit (QIAGEN, 74034), RNA was extracted based on  
57 manufacturer's protocol. RNA was sent to Kazusa Genome Technologies to perform 3'  
58 RNA-seq analysis. cDNA library was prepared using QuantSeq 3' mRNA-Seq Library  
59 Prep Kit for Illumina (FWD) (LEXOGEN, 015.384). Sequencing was done using  
60 Illumina NextSeq 500 and NextSeq 500/550 High Output Kit v2.5 (75 Cycles)  
61 (Illumina, 20024906). Raw reads were analysed by BlueBee Platform (LEXOGEN),  
62 which performs trimming, alignment to *Drosophila* genome, and counting of the reads.  
63 The count data was statistically analysed by Wald test using DESeq2. The result has  
64 been deposited in DDBJ under the accession number DRA011490.

### 65 **Quantitative RT-PCR analysis**

66 Total RNA was purified from five male flies or three-to-five guts using Promega  
67 ReliaPrep RNA Tissue Miniprep kit (z6112). cDNA was made from 200 or 400 ng  
68 DNase-treated total RNA by the Takara PrimeScript RT Reagent Kit with gDNA Eraser  
69 (RR047B). Quantitative PCR was performed using TB Green™ Premix Ex Taq™ (Tli  
70 RNaseH Plus) (Takara bio RR820W) and a Quantstudio6 Flex Real Time PCR system  
71 (ThermoFisher) using *RNA pol2* as an internal control. Primer sequences were listed in  
72 Table S3.

### 73 **16S rRNA gene amplicon sequencing analysis and quantitative PCR of bacteria**

74 Adults were briefly rinsed in PBST (0.1% Triton X-100), 50% (v/v) bleach  
75 (OYALOX), 70% ethanol, and PBS before dissection. Male guts (6-8 per sample)  
76 without tracheae, Malpighian tubules and crop were dissected from day 10 adult flies.  
77 Dissected guts were collected in PBS on ice, then homogenised in 270 µL of lysis  
78 buffer (20 mM Tris pH8.0, 2 mM EDTA and 1% Triton X-100) with 20 mg/mL  
79 lysozyme from chicken egg (Sigma, L4919) using a tissue grinder (BMS BC-G10)  
80 with a pestle (BMS BC-PES50S). The homogenates were incubated at 37°C for 45 min  
81 in a 1.5 mL microcentrifuge tube, then further homogenised in a 2 mL tube (Yasui  
82 Kikai, ST-0250F-O) containing 0.1 mm glass beads (Yasui Kikai YZB01) using a  
83 Multi-beads shocker (Yasui Kikai) at 2500 rpm for 20 sec ×2. To remove bubbles, the  
84 tube was centrifuged briefly. After an additional 15 min incubation at 37°C, 30 µL of  
85 proteinase K and 200 µL of Buffer TL (Qiagen) were added to each sample. The  
86 samples were incubated at 56°C for 15 min. Genomic DNA was purified by QIAamp  
87 DNA Micro kit (Qiagen, 56304) and sent to MacroGen Corp. Japan where 16S rRNA  
88 amplicon sequencing (Illumina MiSeq) and the bioinformatics analysis was performed.  
89 16S rRNAs were amplified using primers targeting V3 and V4 region. The result has  
90 been deposited in DDBJ under the accession number DRA011489.

91 For quantification of bacterial species by quantitative PCR, three different  
92 primer sets were used for *Acetobacter* [57], *Gluconobacter* [58] and *Drosophila GAPDH*

gene for normalisation. Primer sequences were listed in Table S3. For *Acetobacter*, TB Green™ Premix Ex Taq™ (Tli RNaseH Plus) (Takara bio RR820W) was used. For the analysis of *Gluconobacter*, probe-based quantitative PCR was performed using PrimeTime Gene Expression Master Mix (Integrated DNA Technologies, 1055772).

### Colony Forming Unit assay

One fly from each vial is dissected in PBS and homogenised in PBS. The serial dilutions of the homogenate were plated by EDDY JET2 (iUL, PL0300) and the number of colonies on MRS agar plate (Kanto Chemical, 711361-5) was counted after incubation for two days at 30°C.

### Capillary feeder assay for food intake

Two glass capillaries containing 5% sucrose, 2 mg/mL red dye (Acid red 52, Wako, 3520-42-1), and n-Octyl acetate (1:100,000; TCI, 112-14-1) were inserted into the cap. Ten male flies were placed in each vial containing 1% agar to avoid desiccation stress. The level of the food was marked, and the vials were laid in a container with wet towels to prevent water evaporation. The container was incubated at 25°C. After 24 hours, the amount of the food remained in the capillaries was recorded. The vial without flies was also included in the container to subtract evaporation.

### Survival assays

For lifespan analysis, the number of dead flies was counted every three days. To minimise the variation between culturing vials, we used 8-12 vials with 15 flies/vial. For high salt stress, flies were placed onto food containing 500 mM NaCl (Wako, 191-01665), 5% sucrose (Wako, 196-00015), 1% agar (Kishida Chemical, 260-01705). For starvation stress, flies were placed in vials containing 1% agar. For oxidative stress, flies were placed onto food containing 10 mM paraquat (1,1'-Dimethyl-4,4'-bipyridinium Dichloride, Tokyo Chemical Industry, D3685), 5% sucrose, 1% agar. In each assay 15 male flies/vial were incubated at 25°C and the number of dead flies was counted several times in a day.

*P. entomophila* wild-type strain L48 was kindly provided by Dr. B. Lemaitre. Oral infection was performed as described previously [59]. Briefly, *P. entomophila* was grown in LB medium at 29°C overnight and collected by centrifugation. Adult flies were incubated for 2 h at 29°C in an empty vial for starvation and then placed in a fly vial with a bacterial solution. The bacterial solution was obtained by mixing a pellet of bacteria with a culture supernatant (1:1), added to a filter disk that completely covered the surface of the standard fly medium. Flies were maintained at 29°C and mortality was monitored.

### Intestinal alkaline phosphatase supplementation

5,000 units/mL Quick CIP (New England Lab, M0525L) was diluted by enzyme buffer (25 mM Tris-HCl, 1 mM MgCl<sub>2</sub>, 0.1 mM ZnCl<sub>2</sub>, 50% Glycerol, pH=7.5, 25°C). Twenty

47 microliters of the CIP solution were directly applied on top of the standard diet. The  
48 enzyme buffer was used as the negative control. For quantification of *DptA* expression,  
49 the adult flies were fed with 100 units/vial for three days. For lifespan analysis, only 5  
50 units/vial was used for economical reason to treat adult flies throughout the life.

### 51 52 **Quantification and statistical analysis**

53 Statistical analysis was performed using Graphpad Prism 8 except for survival curves  
54 where OASIS2 was used [60]. A two-tailed Student's *t*-test was used to test between two  
55 samples. One-way ANOVA with Sidak's test was used to compare any combination of  
56 interest within a group. Statistical significance; \*,  $p < 0.05$ , \*\*,  $p < 0.01$ , \*\*\*,  $p < 0.001$ ,  
57 \*\*\*\*,  $p < 0.0001$ . Bar graphs were drawn as mean and SEM with all the data point shown  
58 by dots to allow readers to see the number of samples and each raw data.

59  
50

## 51 References

52

- 53 1. Franceschi C, Campisi J. Chronic inflammation (Inflammaging) and its potential contribution to age-  
54 associated diseases. *Journals of Gerontology - Series A Biological Sciences and Medical Sciences*.  
55 Oxford University Press; 2014. pp. S4–S9. doi:10.1093/gerona/glu057
- 56 2. Buchon N, Silverman N, Cherry S. Immunity in *Drosophila melanogaster* — from microbial recognition  
57 to whole-organism physiology. *Nat Rev Immunol*. 2014;14: 796–810. doi:10.1038/nri3763
- 58 3. Guo L, Karpac J, Tran SLL, Jasper H. PGRP-SC2 promotes gut immune homeostasis to limit commensal  
59 dysbiosis and extend lifespan. *Cell*. 2014;156: 109–22. doi:10.1016/j.cell.2013.12.018
- 60 4. Clark RI, Salazar A, Yamada R, Fitz-Gibbon S, Morselli M, Alcaraz J, et al. Distinct Shifts in Microbiota  
61 Composition during *Drosophila* Aging Impair Intestinal Function and Drive Mortality. *Cell Rep*.  
62 2015;12: 1656–1667. doi:10.1016/j.celrep.2015.08.004
- 63 5. Obata F, Fons CO, Gould AP. Early-life exposure to low-dose oxidants can increase longevity via  
64 microbiome remodelling in *Drosophila*. *Nat Commun*. 2018;9: 1–12. doi:10.1038/s41467-018-03070-w
- 65 6. Petkau K, Ferguson M, Guntermann S, Foley E. Constitutive Immune Activity Promotes Tumorigenesis  
66 in *Drosophila* Intestinal Progenitor Cells. *Cell Rep*. 2017;20: 1784–1793.  
67 doi:10.1016/j.celrep.2017.07.078
- 68 7. Kounatidis I, Chtarbanova S, Cao Y, Hayne M, Jayanth D, Ganetzky B, et al. NF- $\kappa$ B Immunity in the  
69 Brain Determines Fly Lifespan in Healthy Aging and Age-Related Neurodegeneration. *Cell Rep*.  
70 2017;19: 836–848. doi:10.1016/j.celrep.2017.04.007
- 71 8. Yamauchi T, Oi A, Kosakamoto H, Akuzawa-Tokita Y, Murakami T, Mori H, et al. Gut Bacterial  
72 Species Distinctively Impact Host Purine Metabolites during Aging in *Drosophila*. *iScience*. 2020;23:  
73 101477. doi:10.1016/j.isci.2020.101477
- 74 9. Hanson MA, Gluckman PD. Early Developmental Conditioning of Later Health and Disease: Physiology  
75 or Pathophysiology? *Physiol Rev*. 2014;94. Available:  
76 <http://physrev.physiology.org/content/94/4/1027.long>
- 77 10. Fleming TP, Watkins AJ, Velazquez MA, Mathers JC, Prentice AM, Stephenson J, et al. Origins of  
78 lifetime health around the time of conception: causes and consequences. *Lancet*. 2018 [cited 25 Apr  
79 2018]. doi:10.1016/S0140-6736(18)30312-X
- 80 11. Preston JD, Reynolds LJ, Pearson KJ. Developmental Origins of Health Span and Life Span: A Mini-  
81 Review. *Gerontology*. 2018 [cited 15 Jan 2018]. doi:10.1159/000485506
- 82 12. Stefana MI, Driscoll PC, Obata F, Pengelly AR, Newell CL, MacRae JI, et al. Developmental diet  
83 regulates *Drosophila* lifespan via lipid autotoxins. *Nat Commun*. 2017;8: 1–13. doi:10.1038/s41467-017-  
84 01740-9
- 85 13. Polan DM, Alansari M, Lee B, Grewal SS. Early-life hypoxia alters adult physiology and reduces stress  
86 resistance and lifespan in *Drosophila*. *J Exp Biol*. 2020;223. doi:10.1242/jeb.226027
- 87 14. Burgner DP, Cooper MN, Moore HC, Stanley FJ, Thompson PL, de Klerk NH, et al. Childhood  
88 Hospitalisation with Infection and Cardiovascular Disease in Early-Mid Adulthood: A Longitudinal  
89 Population-Based Study. Yang X-F, editor. *PLoS One*. 2015;10: e0125342.  
90 doi:10.1371/journal.pone.0125342
- 91 15. Finch CE, Crimmins EM. Inflammatory exposure and historical changes in human life-spans. *Science*.  
92 American Association for the Advancement of Science; 2004. pp. 1736–1739.  
93 doi:10.1126/science.1092556
- 94 16. Furman D, Campisi J, Verdin E, Carrera-Bastos P, Targ S, Franceschi C, et al. Chronic inflammation in  
95 the etiology of disease across the life span. *Nat Med*. 2019;25: 1822–1832. doi:10.1038/s41591-019-  
96 0675-0
- 97 17. Sudmeier LJ, Howard SP, Ganetzky B. A *Drosophila* model to investigate the neurotoxic side effects of  
98 radiation exposure. *DMM Dis Model Mech*. 2015;8: 669–677. doi:10.1242/dmm.019786
- 99 18. Sudmeier LJ, Samudrala SS, Howard SP, Ganetzky B. Persistent activation of the innate immune  
100 response in adult *Drosophila* following radiation exposure during larval development. *G3 Genes,  
101 Genomes, Genet*. 2015;5: 2299–2306. doi:10.1534/g3.115.021782
- 102 19. Houtz P, Bonfini A, Bing X, Buchon N. Recruitment of Adult Precursor Cells Underlies Limited Repair  
103 of the Infected Larval Midgut in *Drosophila*. *Cell Host Microbe*. 2019;26: 412-425.e5.  
104 doi:10.1016/j.chom.2019.08.006
- 105 20. Jensen MB, Qi Y, Riley R, Rabkina L, Jasper H. PGAM5 promotes lasting FoxO activation after  
106 developmental mitochondrial stress and extends lifespan in *Drosophila*. *Elife*. 2017;6.  
107 doi:10.7554/eLife.26952
- 108 21. Owusu-Ansah E, Song W, Perrimon N. Muscle mitohormesis promotes longevity via systemic repression  
109 of insulin signaling. *Cell*. 2013;155: 699–712. doi:10.1016/j.cell.2013.09.021
- 110 22. Osterwalder T, Yoon KS, White BH, Keshishian H. A conditional tissue-specific transgene expression  
111 system using inducible GAL4. *Proc Natl Acad Sci U S A*. 2001;98: 12596–12601.  
112 doi:10.1073/pnas.221303298
- 113 23. Robertson CW. The metamorphosis of *Drosophila melanogaster*, including an accurately timed account  
114 of the principal morphological changes. *J Morphol*. 1936;59: 351–399. doi:10.1002/jmor.1050590207
- 115
- 116
- 117
- 118
- 119
- 120
- 121
- 122
- 123
- 124

- 25 24. Bender M, Imam FB, Talbot WS, Ganetzky B, Hogness DS. *Drosophila* ecdysone receptor mutations  
26 reveal functional differences among receptor isoforms. *Cell*. 1997;91: 777–788. doi:10.1016/S0092-  
27 8674(00)80466-3
- 28 25. Jiang C, Baehrecke EH, Thummel CS. Steroid regulated programmed cell death during *Drosophila*  
29 metamorphosis. *Development*. 1997;124. Available:  
30 [http://dev.biologists.org/content/124/22/4673?ijkey=e143ce3901604de9838cb134c02212d3e4e0b1ec&key](http://dev.biologists.org/content/124/22/4673?ijkey=e143ce3901604de9838cb134c02212d3e4e0b1ec&keytype2=tf_ipsecsha)  
31 [type2=tf\\_ipsecsha](http://dev.biologists.org/content/124/22/4673?ijkey=e143ce3901604de9838cb134c02212d3e4e0b1ec&keytype2=tf_ipsecsha)
- 32 26. Liehl P, Blight M, Vodovar N, Boccard F, Lemaitre B. Prevalence of Local Immune Response against  
33 Oral Infection in a *Drosophila*/Pseudomonas Infection Model. Schneider D, editor. *PLoS Pathog*. 2006;2:  
34 e56. doi:10.1371/journal.ppat.0020056
- 35 27. Kühn F, Adiliaghdam F, Cavallaro PM, Hamarneh SR, Tsurumi A, Hoda RS, et al. Intestinal alkaline  
36 phosphatase targets the gut barrier to prevent aging. *JCI Insight*. 2020;5. doi:10.1172/jci.insight.134049
- 37 28. Tuin A, Poelstra K, De Jager-Krikken A, Bok L, Raaben W, Velders MP, et al. Role of alkaline  
38 phosphatase in colitis in man and rats. *Gut*. 2009;58: 379–387. doi:10.1136/gut.2007.128868
- 39 29. Campbell EL, MacManus CF, Kominsky DJ, Keely S, Glover LE, Bowers BE, et al. Resolvin E1-  
40 induced intestinal alkaline phosphatase promotes resolution of inflammation through LPS detoxification.  
41 *Proc Natl Acad Sci U S A*. 2010;107: 14298–14303. doi:10.1073/pnas.0914730107
- 42 30. Buchon N, Broderick NA, Chakrabarti S, Lemaitre B. Invasive and indigenous microbiota impact  
43 intestinal stem cell activity through multiple pathways in *Drosophila*. *Genes Dev*. 2009;23: 2333–44.  
44 doi:10.1101/gad.1827009
- 45 31. Kosakamoto H, Yamauchi T, Akuzawa-Tokita Y, Nishimura K, Soga T, Murakami T, et al. Local  
46 Necrotic Cells Trigger Systemic Immune Activation via Gut Microbiome Dysbiosis in *Drosophila*. *Cell*  
47 *Rep*. 2020;32: 107938. doi:10.1016/j.celrep.2020.107938
- 48 32. Ryu JH, Kim SH, Lee HY, Jin YB, Nam Y Do, Bae JW, et al. Innate immune homeostasis by the  
49 homeobox gene *Caudal* and commensal-gut mutualism in *Drosophila*. *Science* (80- ). 2008;319: 777–  
50 782. doi:10.1126/science.1149357
- 51 33. DiAngelo JR, Bland ML, Bambina S, Cherry S, Birnbaum MJ. The immune response attenuates growth  
52 and nutrient storage in *Drosophila* by reducing insulin signaling. *Proc Natl Acad Sci U S A*. 2009;106:  
53 20853–20858. doi:10.1073/pnas.0906749106
- 54 34. Georgel P, Naitza S, Kappler C, Ferrandon D, Zachary D, Swimmer C, et al. *Drosophila* Immune  
55 Deficiency (IMD) Is a Death Domain Protein that Activates Antibacterial Defense and Can Promote  
56 Apoptosis. *Dev Cell*. 2001;1: 503–514. doi:10.1016/S1534-5807(01)00059-4
- 57 35. Kurtz J. Specific memory within innate immune systems. *Trends Immunol*. 2005;26: 186–192.  
58 doi:10.1016/j.it.2005.02.001
- 59 36. Netea MG, Domínguez-Andrés J, Barreiro LB, Chavakis T, Divangahi M, Fuchs E, et al. Defining  
60 trained immunity and its role in health and disease. *Nature Reviews Immunology*. *Nature Research*;  
61 2020. pp. 375–388. doi:10.1038/s41577-020-0285-6
- 62 37. Obata F, Kuranaga E, Tomioka K, Ming M, Takeishi A, Chen C-H, et al. Necrosis-Driven Systemic  
63 Immune Response Alters SAM Metabolism through the FOXO-GNMT Axis. *Cell Rep*. 2014;7.  
64 doi:10.1016/j.celrep.2014.03.046
- 65 38. Ding W, Smulan LJ, Hou NS, Taubert S, Watts JL, Walker AK. S-adenosylmethionine levels govern  
66 innate immunity through distinct methylation-dependent pathways. *Cell Metab*. 2015;22: 633–645.  
67 doi:10.1016/j.cmet.2015.07.013
- 68 39. Chen H, Zheng X, Zheng Y. Age-Associated Loss of Lamin-B Leads to Systemic Inflammation and Gut  
69 Hyperplasia. *Cell*. 2014;159: 829–843. doi:10.1016/j.cell.2014.10.028
- 70 40. Russell SL, Gold MJ, Hartmann M, Willing BP, Thorson L, Wlodarska M, et al. Early life antibiotic-  
71 driven changes in microbiota enhance susceptibility to allergic asthma. *EMBO Rep*. 2012;13: 440–447.  
72 doi:10.1038/embor.2012.32
- 73 41. Blanton L V., Charbonneau MR, Salih T, Barratt MJ, Venkatesh S, Ilkaveya O, et al. Gut bacteria that  
74 prevent growth impairments transmitted by microbiota from malnourished children. *Science* (80- ).  
75 2016;351. doi:10.1126/science.aad3311
- 76 42. Gensollen T, Iyer SS, Kasper DL, Blumberg RS. How colonization by microbiota in early life shapes the  
77 immune system. *Science*. *American Association for the Advancement of Science*; 2016. pp. 539–544.  
78 doi:10.1126/science.aad9378
- 79 43. Cox LM, Blaser MJ. Antibiotics in early life and obesity. *Nature Reviews Endocrinology*. *Nature*  
80 *Publishing Group*; 2015. pp. 182–190. doi:10.1038/nrendo.2014.210
- 81 44. Hviid A, Svanström H, Frisch M. Antibiotic use and inflammatory bowel diseases in childhood. *Gut*.  
82 2011;60: 49–54. doi:10.1136/gut.2010.219683
- 83 45. Stiemsma LT, Michels KB. The Role of the microbiome in the developmental origins of health and  
84 disease. *Pediatrics*. 2018;141. doi:10.1542/peds.2017-2437
- 85 46. Kimura I, Miyamoto J, Ohue-Kitano R, Watanabe K, Yamada T, Onuki M, et al. Maternal gut microbiota  
86 in pregnancy influences offspring metabolic phenotype in mice. *Science* (80- ). 2020;367.  
87 doi:10.1126/science.aaw8429



- 38 47. Cox LM, Yamanishi S, Sohn J, Alekseyenko A V., Leung JM, Cho I, et al. Altering the intestinal  
39 microbiota during a critical developmental window has lasting metabolic consequences. *Cell*. 2014;158:  
40 705–721. doi:10.1016/j.cell.2014.05.052
- 41 48. Nobel YR, Cox LM, Kirigin FF, Bokulich NA, Yamanishi S, Teitler I, et al. Metabolic and metagenomic  
42 outcomes from early-life pulsed antibiotic treatment. *Nat Commun*. 2015;6: 7486.  
43 doi:10.1038/ncomms8486
- 44 49. Leclercq S, Mian FM, Stanisz AM, Bindels LB, Cambier E, Ben-Amram H, et al. Low-dose penicillin in  
45 early life induces long-term changes in murine gut microbiota, brain cytokines and behavior. *Nat*  
46 *Commun*. 2017;8: 1–12. doi:10.1038/ncomms15062
- 47 50. Kurz CL, Charroux B, Chaduli D, Viallat-Lieutaud A, Royet J. Peptidoglycan sensing by octopaminergic  
48 neurons modulates *Drosophila* oviposition. *Elife*. 2017;6. doi:10.7554/eLife.21937
- 49 51. Clark RI, Tan SWS, Péan CB, Roostalu U, Vivancos V, Bronda K, et al. MEF2 is an in vivo immune-  
50 metabolic switch. *Cell*. 2013;155: 435. doi:10.1016/j.cell.2013.09.007
- 51 52. Davoodi S, Galenza A, Panteluk A, Deshpande R, Ferguson M, Grewal S, et al. The Immune Deficiency  
52 Pathway Regulates Metabolic Homeostasis in *Drosophila* . *J Immunol*. 2019;202: 2747–2759.  
53 doi:10.4049/jimmunol.1801632
- 54 53. Combe BE, Defaye A, Bozonnet N, Puthier D, Royet J, Leulier F. *Drosophila* microbiota modulates host  
55 metabolic gene expression via IMD/NF- $\kappa$ B signaling. Moreno E, editor. *PLoS One*. 2014;9: e94729.  
56 doi:10.1371/journal.pone.0094729
- 57 54. Broderick NA, Buchon N, Lemaitre B. Microbiota-Induced Changes in *Drosophila melanogaster* Host  
58 Gene Expression and Gut Morphology. *MBio*. 2014;5. doi:10.1128/mBio.01117-14
- 59 55. Kamareddine L, Robins WP, Berkey CD, Mekalanos JJ, Watnick PI. The *Drosophila* Immune Deficiency  
60 Pathway Modulates Enteroendocrine Function and Host Metabolism. *Cell Metab*. 2018;28: 449-462.e5.  
doi:10.1016/j.cmet.2018.05.026
- 61 56. Tricoire H, Battisti V, Trannoy S, Lasbleiz C, Pret AM, Monnier V. The steroid hormone receptor EcR  
62 finely modulates *Drosophila* lifespan during adulthood in a sex-specific manner. *Mech Ageing Dev*.  
63 2009;130: 547–552. doi:10.1016/j.mad.2009.05.004
- 64 57. Fridmann-Sirkis Y, Stern S, Elgart M, Galili M, Zeisel A, Shental N, et al. Delayed development induced  
65 by toxicity to the host can be inherited by a bacterial-dependent, transgenerational effect. *Front Genet*.  
66 2014;5: 27. doi:10.3389/fgene.2014.00027
- 67 58. Torija MJ, Mateo E, Guillamón JM, Mas A. Identification and quantification of acetic acid bacteria in  
68 wine and vinegar by TaqMan–MGB probes. *Food Microbiol*. 2010;27: 257–265.  
69 doi:10.1016/j.fm.2009.10.001
- 70 59. Kuraishi T, Binggeli O, Opota O, Buchon N, Lemaitre B. Genetic evidence for a protective role of the  
71 peritrophic matrix against intestinal bacterial infection in *Drosophila melanogaster*. *Proc Natl Acad Sci U*  
72 *S A*. 2011;108: 15966–15971. doi:10.1073/pnas.1105994108
- 73 60. Han SK, Lee D, Lee H, Kim D, Son HG, Yang JS, et al. OASIS 2: Online application for survival  
74 analysis 2 with features for the analysis of maximal lifespan and healthspan in aging research.  
75 *Oncotarget*. 2016. doi:10.18632/oncotarget.11269
- 76  
77  
78  
79

30 **Acknowledgments**

31

32 We thank Corey Goodman, Edan Foley, Bruno Lemaitre, and Scott Pletcher for  
33 *Drosophila* stocks. We thank Yoriko Akuzawa-Tokita for technical assistance and all  
34 other members of Miura's laboratory for active discussion. This work was supported  
35 by AMED-PRIME to F.O. under Grant Number 20gm6010010h0004 and  
36 20gm6310011h0001 and to T.K. under Grant Number 20gm6010011h0004, and by  
37 AMED-Project for Elucidating and Controlling Mechanisms of Aging and Longevity  
38 to M.M under Grant Number JP20gm5010001. This work was also supported by  
39 grants from the Japan Society for the Promotion of Science to F.O. under Grant  
40 Number 19H03367 and 20H05726, and to M.M. under Grant Number 16H06385.

41

42

43 **Author contributions:**

44 F.O. and M.M. conceived and supervised the project. K.Y. and A.O. performed  
45 experiments and analysed data. H.Kosakamoto established methodology and analysed  
46 data. T.Y. established UroGS fly and assisted some experiments. H.Kadoguchi and  
47 T.K. performed oral infection experiment and suggested directions. F.O. wrote the  
48 initial manuscript. All authors edited and approved the final manuscript.

49

50

51 **Competing interests:** The authors declare no competing interests.

52

53

## Figures and Tables

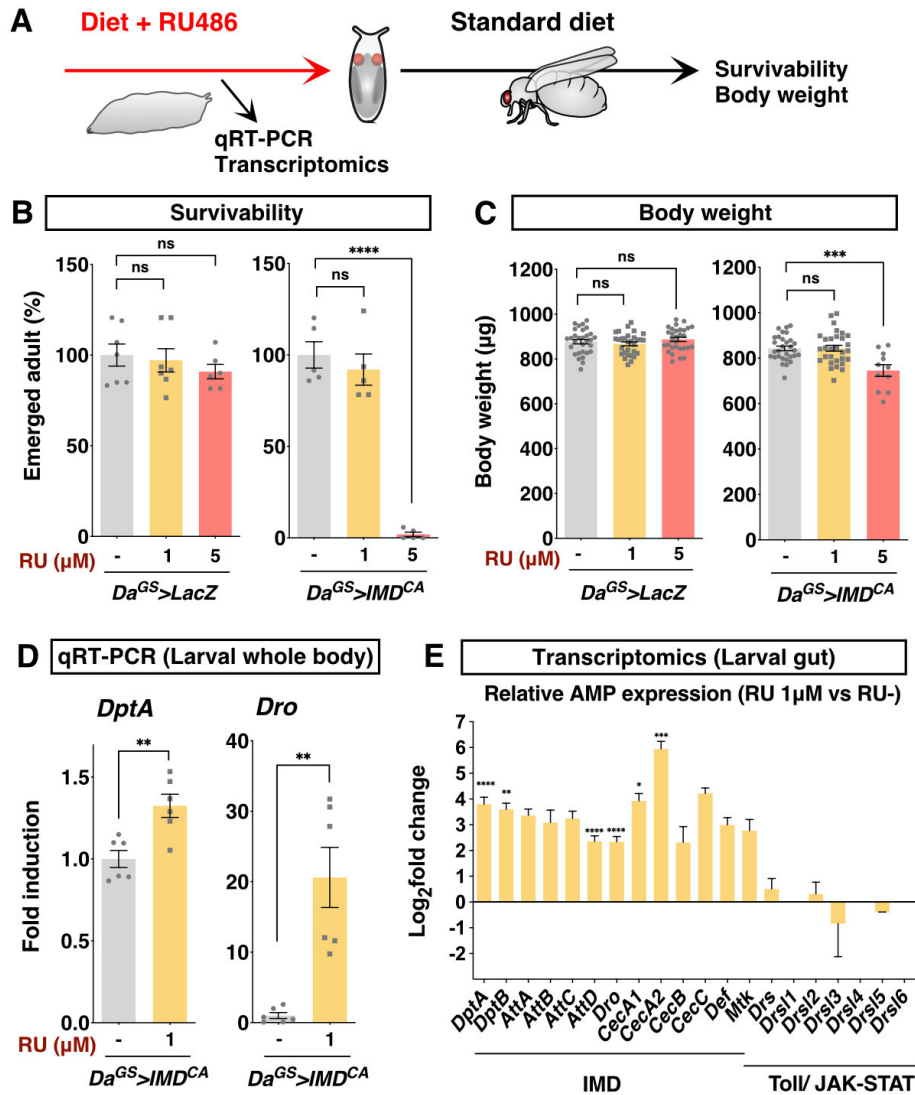

**Fig. 1. Mild IMD activation using Gene Switch (GS) system does not disturb development.** (A), Experimental scheme. (B), Developmental survivability of flies expressing constitutive active form of IMD (*IMD<sup>CA</sup>*) or negative control (*LacZ*). Average numbers of flies successfully developed under each condition were shown. *Daughterless* Gene Switch driver is used to induce gene expression ubiquitously by RU486. n=5-7. (C), Adult body weight. One-week-old adult male flies are used. n=20-50 individual flies. (D), Quantitative RT-PCR of IMD target genes *Diptericin A* (*DptA*) and *Drosocin* (*Dro*) in the whole body of third instar larvae. n=6. (E), Transcriptomic analysis of the larval gut from *Da<sup>GS</sup>>IMD<sup>CA</sup>* third instar larvae. Relative to the negative control (no RU486 treatment) is shown. n=3. Each graph is shown as mean  $\pm$  SEM. Statistics, \*\*,  $p < 0.01$ , \*\*\*,  $p < 0.001$ , \*\*\*\*,  $p < 0.0001$ , ns, not significant.

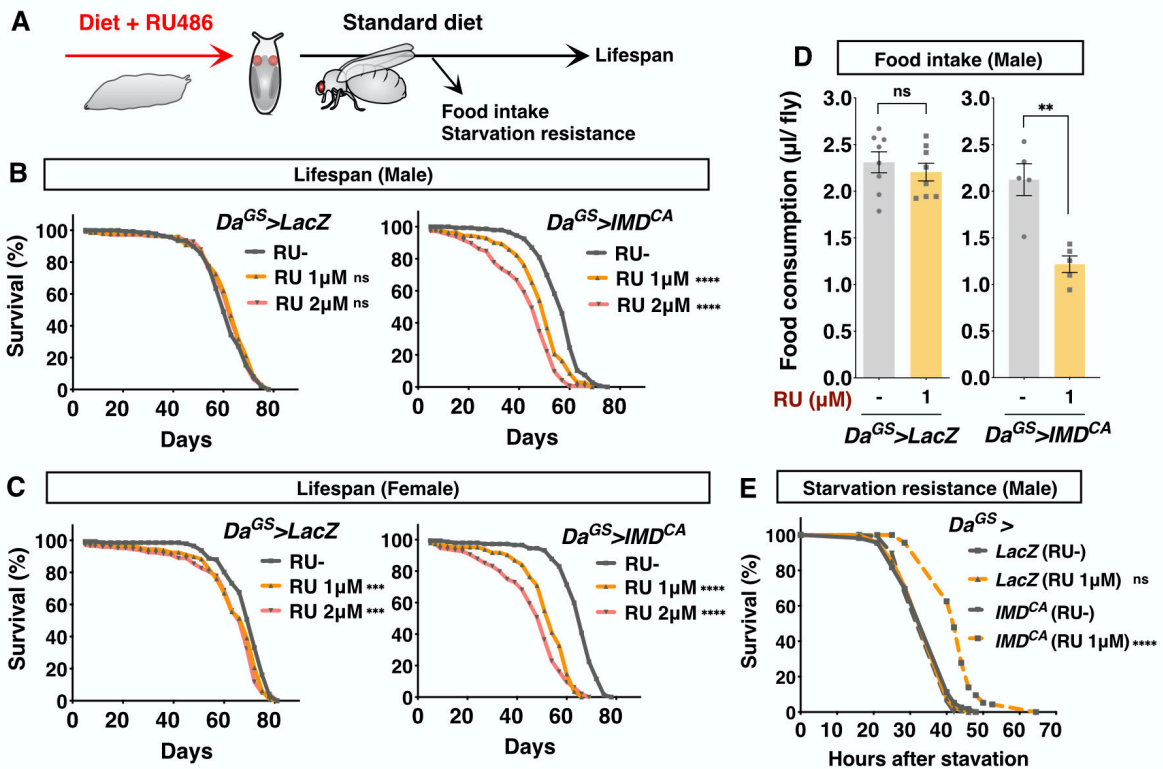

**Fig. 2. Larval IMD activation leads to shortened lifespan, decreased food intake, and increased starvation resistance in adult.** (A), Experimental scheme. Food intake and starvation resistance were measured at one week after eclosion. (B, C), Lifespan of male (B) and female (C) flies with RU486 treatment during development. *Daughterless Gene Switch* driver ( $Da^{GS}$ ) was used to induce constitutive active form of IMD ( $IMD^{CA}$ ) or negative control ( $LacZ$ ) ubiquitously by RU486 in the larval stage.  $n=120-150$ . (D), Amount of food intake of adult male flies assessed by capillary feeder (CAFE) assay.  $n=5-8$  vials. (E), Survival curve under starvation condition (1% agar) of male flies.  $n=70-80$ . Each graph is shown as mean  $\pm$  SEM. Statistics, \*\*,  $p<0.01$ , \*\*\*,  $p<0.001$ , \*\*\*\*,  $p<0.0001$ , ns, not significant.

72  
 73  
 74  
 75  
 76  
 77  
 78  
 79  
 80  
 81  
 82  
 83  
 84

35

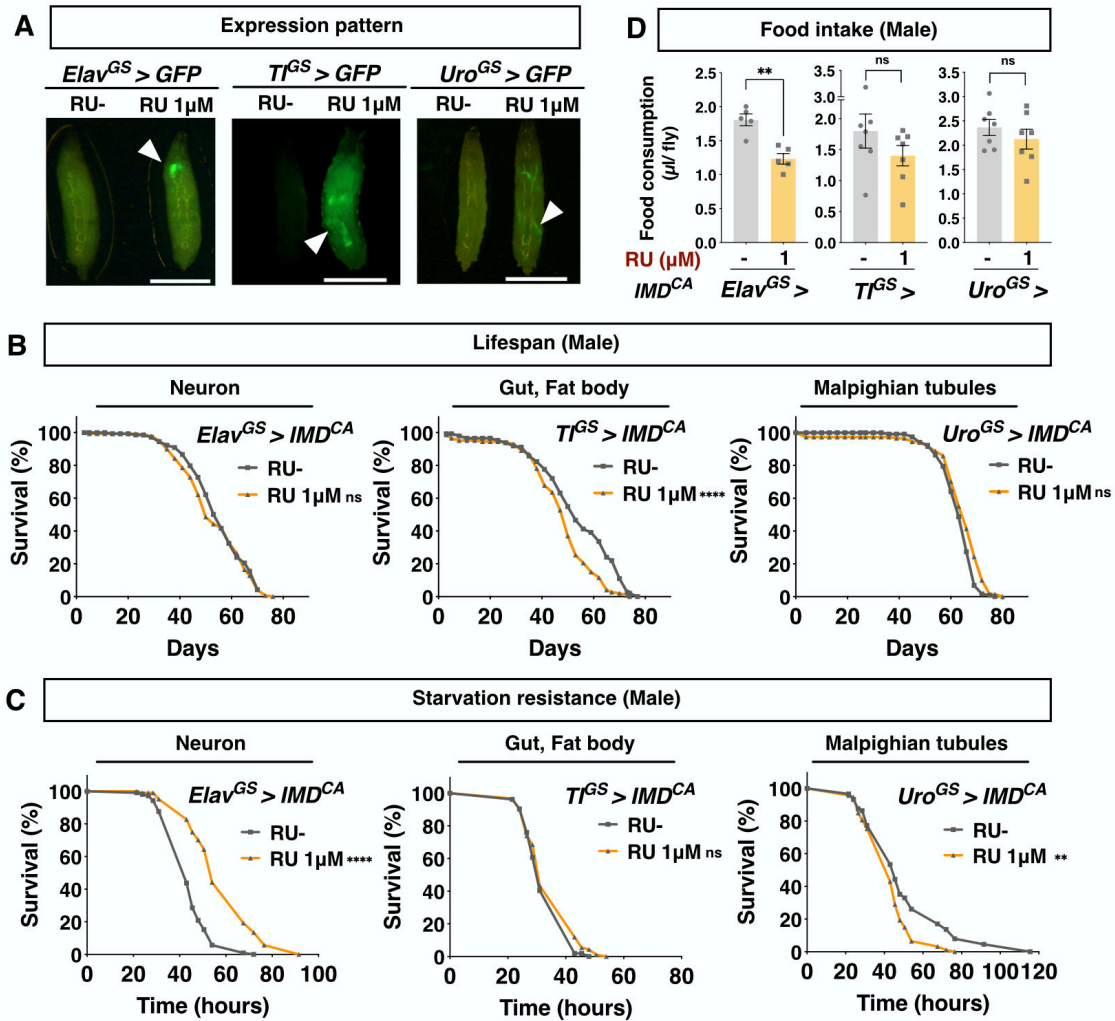

**Fig. 3. Tissue specific effect of larval IMD activation on adult phenotypes.** (A), Expression pattern of each Gene Switch driver upon 1 µM of RU486. Arrowheads indicate the GFP expression. Scale bars, 1mm. (B), Lifespan of male flies. Gene Switch drivers are used to induce constitutive active form of IMD (*IMD<sup>CA</sup>*) by RU486 in the larval stage. n=120-150. (C), Survival curve of male flies under starvation condition (1% agar). n=70-80. (D), Amount of food intake of adult male flies assessed by capillary feeder (CAFE) assay. n=5-7 vials. Food intake and starvation resistance are measured at one week after eclosion. Each graph is shown as mean ± SEM. Statistics, \*\*,  $p < 0.01$ , \*\*\*\*,  $p < 0.0001$ , ns, not significant.

36

37

38

39

40

41

42

43

44

45

46

47

48

49

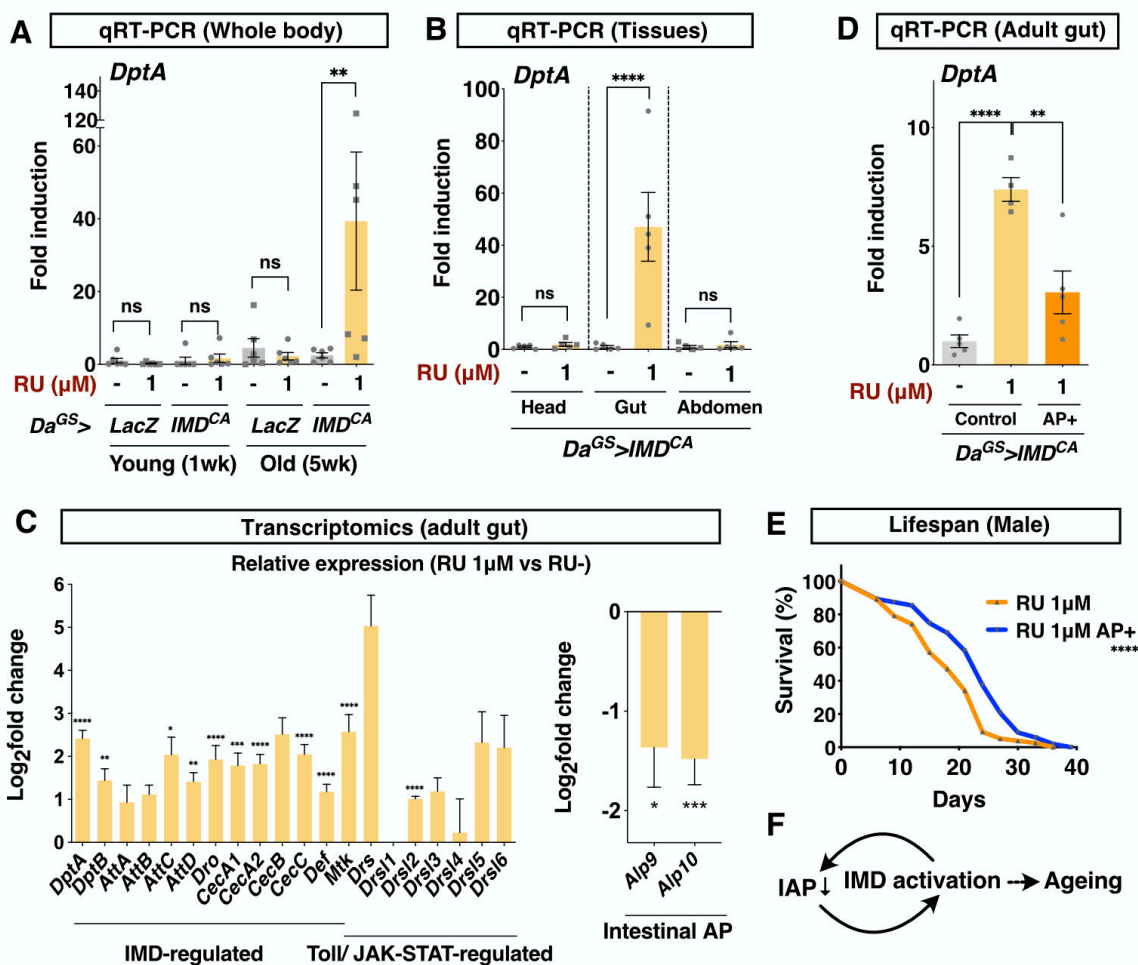

**Fig. 4. Larval IMD activation induces inflammatory intestine in adult.** (A), Quantitative RT-PCR of IMD target gene *Diptericin A* (*DptA*) in the whole body of male flies. *Daughterless* Gene Switch driver ( $Da^{GS}$ ) is used to induce constitutive active form of IMD ( $IMD^{CA}$ ) or negative control (*LacZ*) ubiquitously by RU486 in the larval stage. n=6. (B), Quantitative RT-PCR of IMD target gene *Diptericin A* (*DptA*) in each body part of 5-week-old male flies. n=5. (C), Transcriptomic analysis of the adult gut from one-week-old  $Da^{GS}>IMD^{CA}$  male flies. Relative to the negative control (no RU486 treatment) is shown. n=3. (D), Quantitative RT-PCR of IMD target gene *Diptericin A* (*DptA*) in the adult gut. n=4-5. AP+, the flies fed with exogenous alkaline phosphatase supplemented on top of the fly food (100 unit/vial) for three days. (E), Lifespan of  $Da^{GS}>IMD^{CA}$  male flies with or without alkaline phosphatase supplementation (5 unit/vial). n=120-150. (F), Model. Each graph is shown as mean  $\pm$  SEM. Statistics, \*,  $p<0.05$ , \*\*,  $p<0.01$ , \*\*\*,  $p<0.001$ , \*\*\*\*,  $p<0.0001$ , ns, not significant.

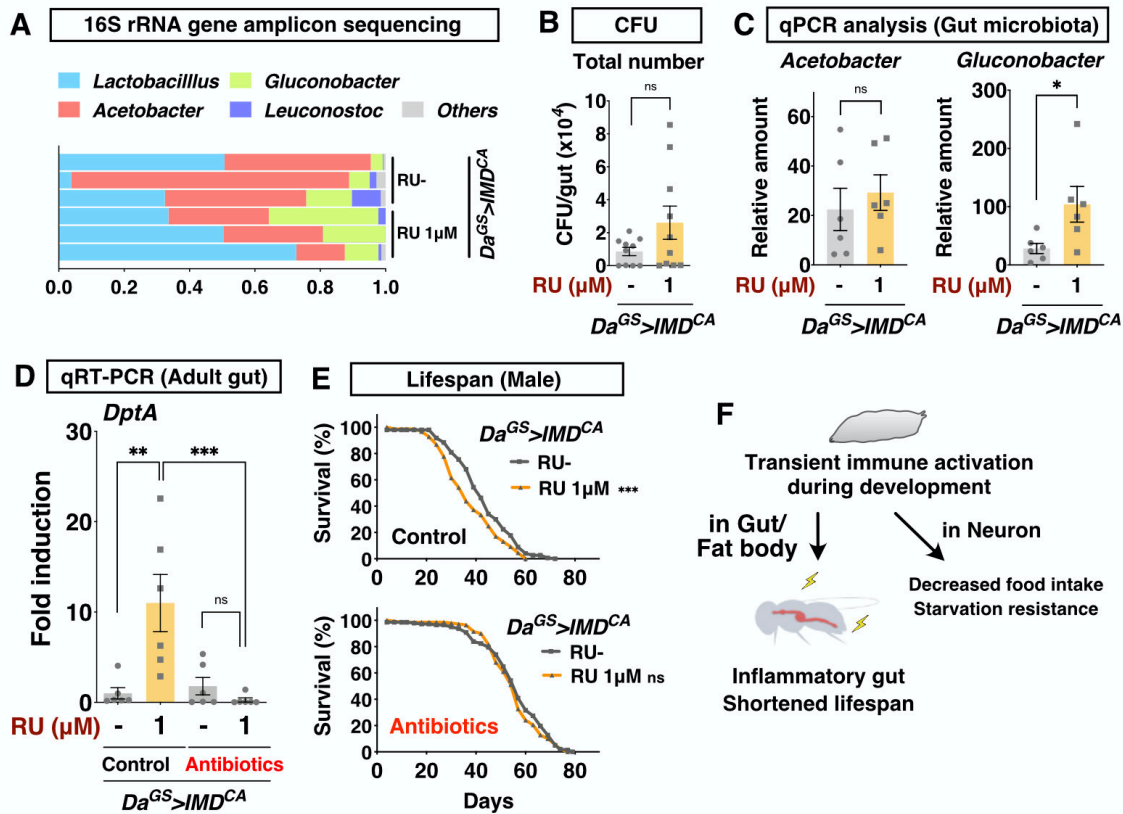

**Fig. 5. Removing gut microbiota rescues shortened lifespan.** (A), 16S rRNA gene amplicon sequencing analysis of adult male gut. Each genus is shown using different color. Three biological replicates for each condition. *Daughterless* Gene Switch driver ( $Da^{GS}$ ) is used to induce constitutive active form of IMD ( $IMD^{CA}$ ) ubiquitously by RU486 in the larval stage. (B), Colony forming unit assay to count the number of live bacteria from the adult male gut.  $n=10$ . (C), Quantitative PCR of *Acetobacter* or *Gluconobacter* in the adult male gut.  $n=6$ . (D), Quantitative RT-PCR of IMD target gene *Diptericin A* (*DptA*) in the adult gut. See methods for the composition of antibiotic cocktail.  $n=6$ . These phenotypes are analysed at one week after eclosion (A-D). (E), Lifespan of male flies with or without antibiotics supplementation in adult.  $n=120-150$ . (F), Model. Each graph is shown as mean  $\pm$  SEM. Statistics, \*,  $p<0.05$ , \*\*,  $p<0.01$ , \*\*\*,  $p<0.001$ , ns, not significant.

Supplementary Figures and Tables

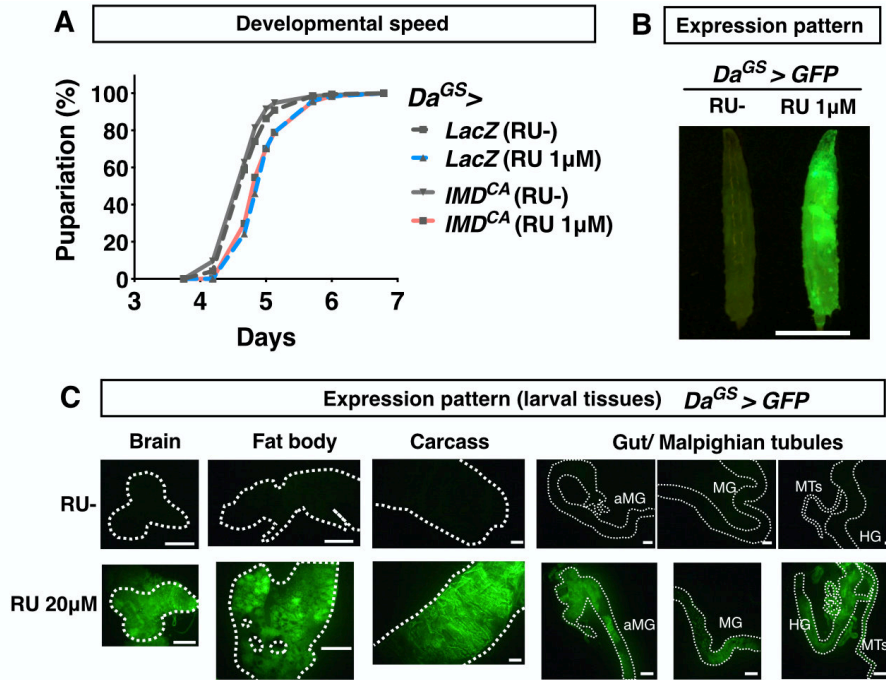

Fig. S1. Mild IMD activation using Gene Switch system does not delay

development. (A), Developmental timing of flies expressing constitutive active form of IMD (*IMD<sup>CA</sup>*) or negative control (*LacZ*) by *Daughterless* Gene Switch driver (*Da<sup>GS</sup>*) with or without 1  $\mu$ M of RU486. (B), Expression pattern of *Daughterless* Gene Switch driver upon 1  $\mu$ M of RU486 visualised by GFP. Scale bar, 1mm. (C), Expression pattern of *Daughterless* Gene Switch driver in the larval tissues. GFP is induced by 20  $\mu$ M of RU486. Scale bars, 200  $\mu$ m.



50

51

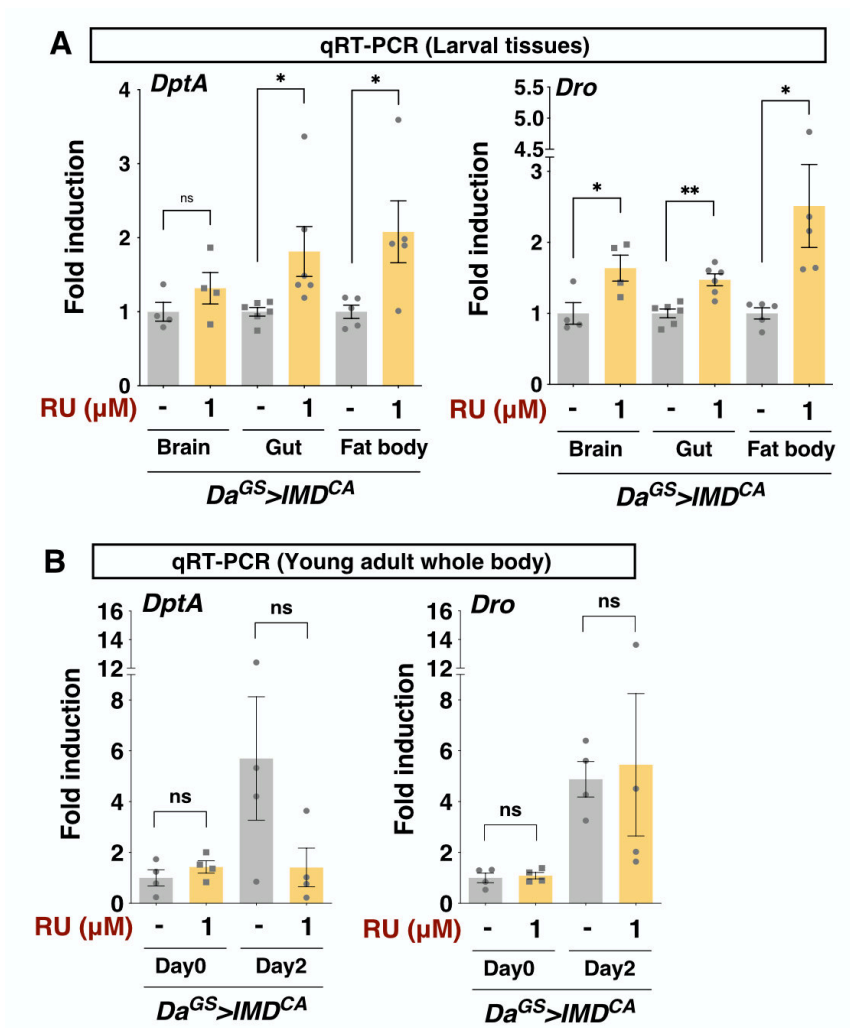

52

53

54

55

56

57

58

59

50

51

52

53

54

**Fig. S2. Transient Larval IMD activation by  $Da^{GS}$ .** (A), Quantitative RT-PCR of IMD target genes *Diptericin A* (*DptA*) and *Drosocin* (*Dro*) in the third instar larval organs. *Daughterless* Gene Switch driver ( $Da^{GS}$ ) is used to induce constitutive active form of IMD ( $IMD^{CA}$ ) or negative control (*LacZ*) ubiquitously by RU486. n=4-6. (B), Quantitative RT-PCR of IMD target genes *Diptericin A* (*DptA*) and *Drosocin* (*Dro*) in the whole body of day0 or day2 male flies. n=4. Each graph is shown as mean  $\pm$  SEM. Statistics, \*,  $p < 0.05$ , \*\*,  $p < 0.01$ , ns, not significant.

55

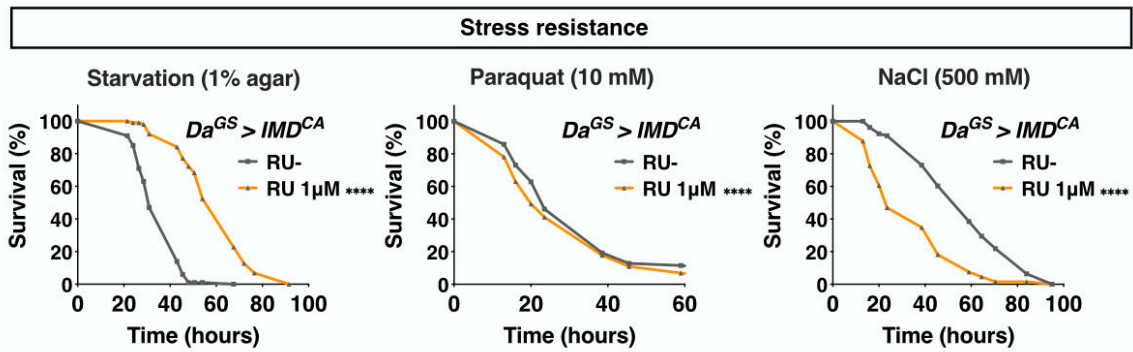

56

57

58

59

70

71

72

73

74

**Fig. S3. Larval IMD activation alters resistance to environmental stressors in adult.** (A), Survival curves under starvation (1% agar), paraquat (10 mM), or high-salt (NaCl 500 mM) conditions of one-week-old male flies that experienced larval IMD activation. *Daughterless* Gene Switch driver ( $Da^{GS}$ ) is used to induce constitutive active form of IMD ( $IMD^{CA}$ ) ubiquitously by RU486 in the larval stage. n=70-80.

75

76

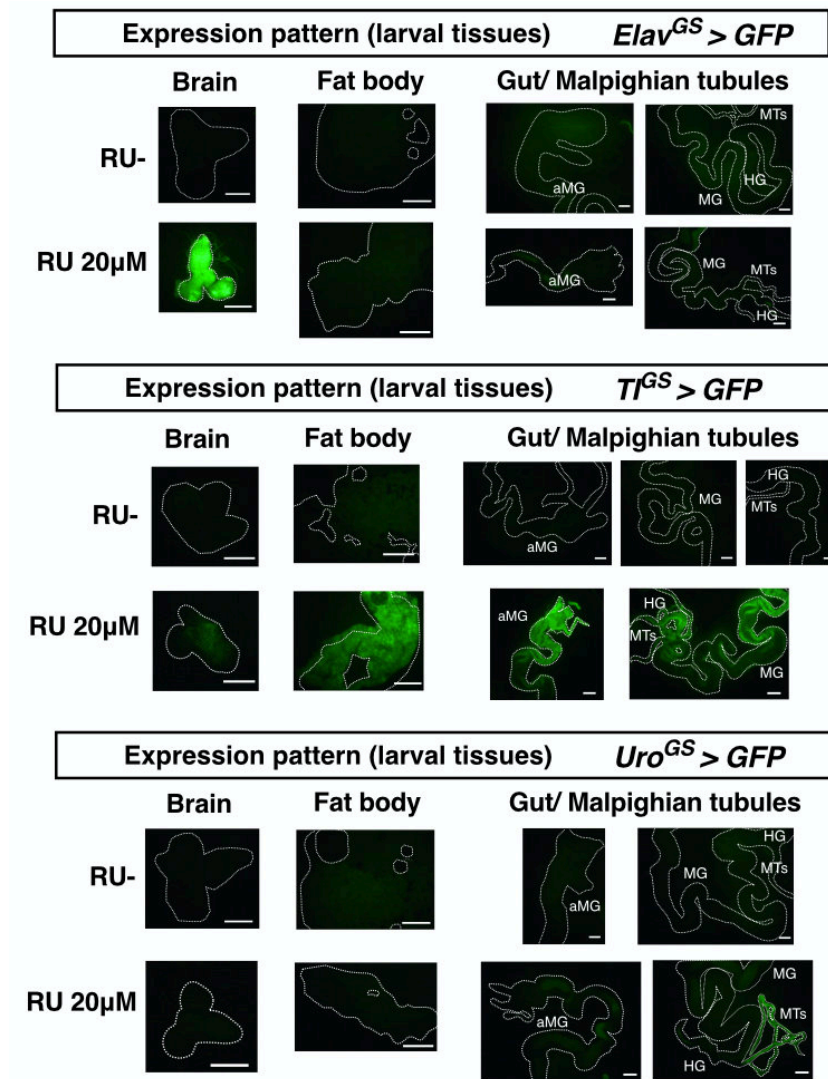

77

78

79

80

81

82

83

84

85

86

**Fig. S4. Expression patterns of Geneswitch drivers in the larval tissues.** GFP was expressed by  $Elav^{GS}$ ,  $TI^{GS}$ , and  $Uro^{GS}$  drivers using 20  $\mu$ M RU486. Third-instar larvae were dissected and GFP was visualised by fluorescent microscopy. Scale bars, 200  $\mu$ m.

37

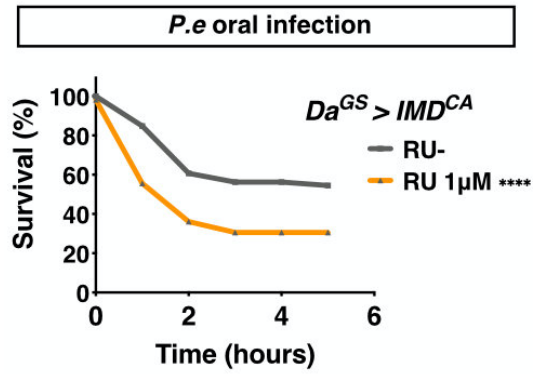

38

39

40

**Fig. S5. Adult flies upon larval IMD activation are susceptible to oral infection.**

41

42

43

44

45

46

47

Survival curves upon *P. entomophila* oral infection of one-week-old male flies that have experienced larval IMD activation. *Daughterless* Gene Switch driver (*Da<sup>GS</sup>*) is used to induce constitutive active form of IMD (*IMD<sup>CA</sup>*) ubiquitously by RU486 in the larval stage. n=100-110.

98

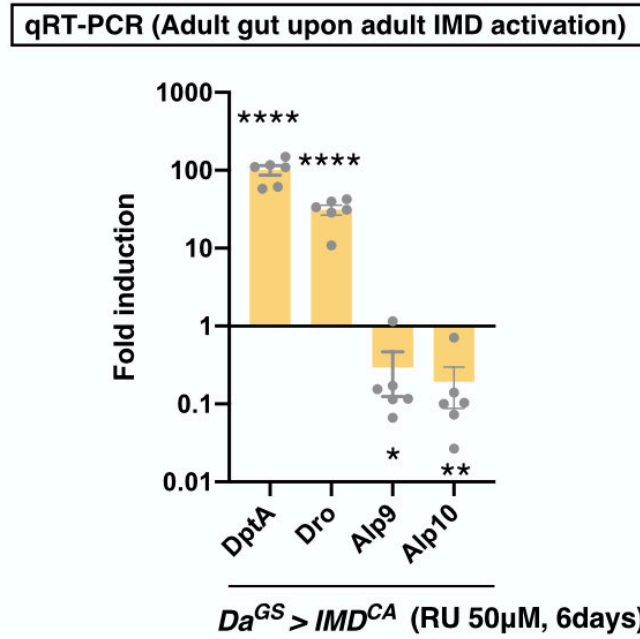

99

100

101

102

103

104

105

106

107

108

109

**Fig. S6. IMD activation in adult flies decreases IAP expression.** Quantitative RT-PCR of *DptA*, *Dro*, *Alp9*, and *Alp10* in the adult gut. *Daughterless* Gene Switch driver ( $Da^{GS}$ ) is used to induce constitutive active form of IMD ( $IMD^{CA}$ ).  $Da^{GS} > IMD^{CA}$  female flies were fed with 50  $\mu$ M RU486 for 6 days. n=6. Each graph is shown as mean  $\pm$  SEM. Statistics, \*,  $p < 0.05$ , \*\*,  $p < 0.01$ , \*\*\*\*,  $p < 0.0001$ , ns, not significant.

**Table S1. Differentially-expressed genes in the larval gut upon mild IMD activation (Fold change>1.5 or <0.67, adjusted *p*-value<0.05).**

| Symbol                      | Gene Name                                             | Fold Change | <i>p</i> -value |
|-----------------------------|-------------------------------------------------------|-------------|-----------------|
| <b>Up-regulated genes</b>   |                                                       |             |                 |
| CecA2                       | Cecropin A2                                           | 61.82       | 4.91.E-04       |
| CecA1                       | Cecropin A1                                           | 15.21       | 2.78.E-02       |
| DptA                        | Diptericin A                                          | 13.86       | 6.27.E-12       |
| DptB                        | Diptericin B                                          | 12.12       | 1.41.E-03       |
| Zip42C.1                    | Zinc/iron regulated transporter-related protein 42C.1 | 11.41       | 5.30.E-03       |
| AttD                        | Attacin-D                                             | 5.12        | 2.46.E-06       |
| Dro                         | Drosocin                                              | 5.05        | 1.69.E-05       |
| edin                        | elevated during infection                             | 4.76        | 1.68.E-02       |
| CG14606                     | uncharacterized protein                               | 3.64        | 6.30.E-03       |
| CG14205                     | uncharacterized protein                               | 3.02        | 1.97.E-03       |
| CG1139                      | uncharacterized protein                               | 2.73        | 7.28.E-03       |
| l(2)34Fc                    | lethal (2) 34Fc                                       | 2.50        | 6.03.E-03       |
| Diedel3                     | Diedel 3                                              | 2.42        | 3.28.E-03       |
| CG13078                     | uncharacterized protein                               | 2.38        | 4.84.E-02       |
| CG32751                     | uncharacterized protein                               | 2.31        | 6.98.E-04       |
| CG13325                     | uncharacterized protein                               | 2.29        | 1.51.E-04       |
| CG5157                      | uncharacterized protein                               | 2.26        | 2.26.E-03       |
| CG15255                     | uncharacterized protein                               | 2.15        | 1.51.E-02       |
| Amy-d                       | Amylase distal                                        | 1.97        | 6.03.E-03       |
| Ugt37A2                     | UDP-glycosyltransferase family 37 member A2           | 1.94        | 5.23.E-03       |
| CG17570                     | uncharacterized protein                               | 1.91        | 5.23.E-03       |
| Pdxk                        | Pyridoxal kinase                                      | 1.83        | 1.41.E-03       |
| CG8773                      | uncharacterized protein                               | 1.76        | 1.23.E-02       |
| CG4752                      | uncharacterized protein                               | 1.70        | 2.75.E-02       |
| JhI-26                      | Juvenile hormone-inducible protein 26                 | 1.68        | 2.75.E-02       |
| Npc2c                       | Niemann-Pick type C-2c                                | 1.65        | 2.41.E-02       |
| Alp10                       | Alkaline phosphatase 10                               | 1.64        | 3.32.E-02       |
| CG10116                     | uncharacterized protein                               | 1.57        | 5.23.E-03       |
| <b>Down-regulated genes</b> |                                                       |             |                 |
| Lcp9                        | Larval cuticle protein 9                              | 0.089       | 2.43.E-02       |
| CG17107                     | uncharacterized protein                               | 0.121       | 1.74.E-02       |
| Lcp4                        | Larval cuticle protein 4                              | 0.149       | 4.91.E-04       |
| CG42500                     | uncharacterized protein                               | 0.180       | 4.74.E-03       |
| CG13678                     | uncharacterized protein                               | 0.212       | 2.43.E-02       |
| CG10081                     | uncharacterized protein                               | 0.223       | 3.98.E-06       |
| Cpr47Eb                     | Cuticular protein 47Eb                                | 0.321       | 2.07.E-02       |
| CG11737                     | uncharacterized protein                               | 0.399       | 3.72.E-02       |
| CG6277                      | uncharacterized protein                               | 0.423       | 8.20.E-04       |
| bmm                         | brummer                                               | 0.508       | 6.98.E-04       |
| fax                         | failed axon connections                               | 0.547       | 2.22.E-03       |

10  
11  
12  
13

14  
15  
16

**Table S2. Differentially-expressed genes in the adult gut upon larval IMD activation (Fold change>2 or <0.5, adjusted *p*-value<0.05).**

| Symbol                      | Gene Name                                   | Fold Change | <i>p</i> -value |
|-----------------------------|---------------------------------------------|-------------|-----------------|
| <b>Up-regulated genes</b>   |                                             |             |                 |
| Mtk                         | Metchnikowin                                | 5.95        | 6.63E-04        |
| DptA                        | Diptericin A                                | 5.32        | 3.93E-16        |
| CecC                        | Cecropin C                                  | 4.13        | 9.41E-07        |
| AttC                        | Attacin-C                                   | 4.10        | 1.60E-02        |
| Dro                         | Drosocin                                    | 3.80        | 8.27E-06        |
| CecA2                       | Cecropin A2                                 | 3.55        | 6.02E-05        |
| CecA1                       | Cecropin A1                                 | 3.45        | 1.36E-04        |
| lncRNA:CR45045              | long non-coding RNA:CR45045                 | 3.38        | 7.33E-04        |
| Listericin                  | listericin                                  | 2.90        | 8.38E-03        |
| edin                        | elevated during infection                   | 2.85        | 6.79E-03        |
| DptB                        | Diptericin B                                | 2.72        | 4.67E-03        |
| AttD                        | Attacin-D                                   | 2.67        | 4.04E-03        |
| CG4269                      | uncharacterized protein                     | 2.62        | 1.42E-02        |
| CG16995                     | uncharacterized protein                     | 2.59        | 1.88E-03        |
| Def                         | Defensin                                    | 2.26        | 3.17E-05        |
| PGRP-SD                     | Peptidoglycan recognition protein SD        | 2.23        | 7.49E-04        |
| CG10383                     | uncharacterized protein                     | 2.08        | 1.97E-03        |
| Drsl2                       | Drosomyacin-like 2                          | 2.01        | 6.67E-04        |
| Cht4                        | Chitinase 4                                 | 2.01        | 4.87E-02        |
| <b>Down-regulated genes</b> |                                             |             |                 |
| CG8745                      | uncharacterized protein                     | 0.303       | 7.33.E-04       |
| CG7567                      | uncharacterized protein                     | 0.311       | 1.29.E-12       |
| CG43673                     | uncharacterized protein                     | 0.331       | 1.60.E-03       |
| Alp10                       | Alkaline phosphatase 10                     | 0.359       | 1.81.E-04       |
| Alp9                        | Alkaline phosphatase 9                      | 0.389       | 4.25.E-02       |
| CG3348                      | uncharacterized protein                     | 0.397       | 2.21.E-03       |
| Akh                         | Adipokinetic hormone                        | 0.416       | 1.40.E-02       |
| CG32512                     | uncharacterized protein                     | 0.419       | 9.15.E-03       |
| CG7231                      | uncharacterized protein                     | 0.432       | 1.48.E-02       |
| sug                         | sugarbabe                                   | 0.446       | 9.94.E-05       |
| CG2680                      | uncharacterized protein                     | 0.451       | 7.33.E-04       |
| CG9119                      | uncharacterized protein                     | 0.461       | 3.85.E-04       |
| CG33301                     | uncharacterized protein                     | 0.467       | 4.03.E-06       |
| CG5346                      | uncharacterized protein                     | 0.474       | 3.07.E-07       |
| CtrlB                       | Copper transporter 1B                       | 0.475       | 1.44.E-04       |
| Ser8                        | Ser8                                        | 0.495       | 2.63.E-02       |
| CG15096                     | uncharacterized protein                     | 0.496       | 2.68.E-03       |
| Drat                        | Death resistor Adh domain containing target | 0.496       | 3.38.E-02       |

17  
18  
19

20  
21  
22

**Table S3. Primer sequences for quantitative PCR analysis.**

| Target               | Forward primer           | Reverse primer            |
|----------------------|--------------------------|---------------------------|
| <i>RNA pol2</i>      | CCTTCAGGAGTACGGCTATCATCT | CCAGGAAGACCTGAGCATTAAATCT |
| <i>RpL32</i>         | CGGATCGATATGCTAAGCTGT    | CGACGCACTCTGTTGTCG        |
| <i>DptA</i>          | CGTCGCCTTACTTTGCTGC      | CCCTGAAGATTGAGTGGGTACTG   |
| <i>Dro</i>           | CCATCGAGGATCACCTGACT     | CTTTAGGCGGGCAGAATG        |
| <i>Alp9</i>          | ATAGCGCCTGTACCTCAACCT    | CAGTCGCCTCGCTTCACAT       |
| <i>Alp10</i>         | CCAGGCCCGGAGTGATCTA      | TTATCGTGCCAGAATCGTGTG     |
| <i>GAPDH</i>         | TAAATTCGACTCGACTCACGGT   | CTCC ACCACATACTCGGCTC     |
| <i>Acetobacter</i>   | TAGTGGCGGACGGGTGAGTA     | AATCAAACGCAGGCTCCTCC      |
| <i>Gluconobacter</i> | CCCAGTGTAGAGGTGAAATTCGT  | CCAGGGTATCTAATCCTGTTTGCT  |

23

24

25

26
